# Supplementary material for: Self-supervised graph representation learning integrates multiple molecular networks and decodes gene-disease relationships
Source: PubMed Central journal article supplement — Patterns (N Y). 2022 Dec 6;4(1):100651. doi: 10.1016/j.patter.2022.100651 (PMC9868676; doi:10.1016/j.patter.2022.100651), 2022-12-06
Supplement: mmc1.pdf [file mmc1.pdf]

**Patterns, Volume 4**

**Supplemental information**

**Self-supervised graph representation learning  
integrates multiple molecular networks and  
decodes gene-disease relationships**

**Yi Wang, Zijun Sun, Qiushun He, Jiwei Li, Ming Ni, and Meng Yang**

# Supplementary Figures

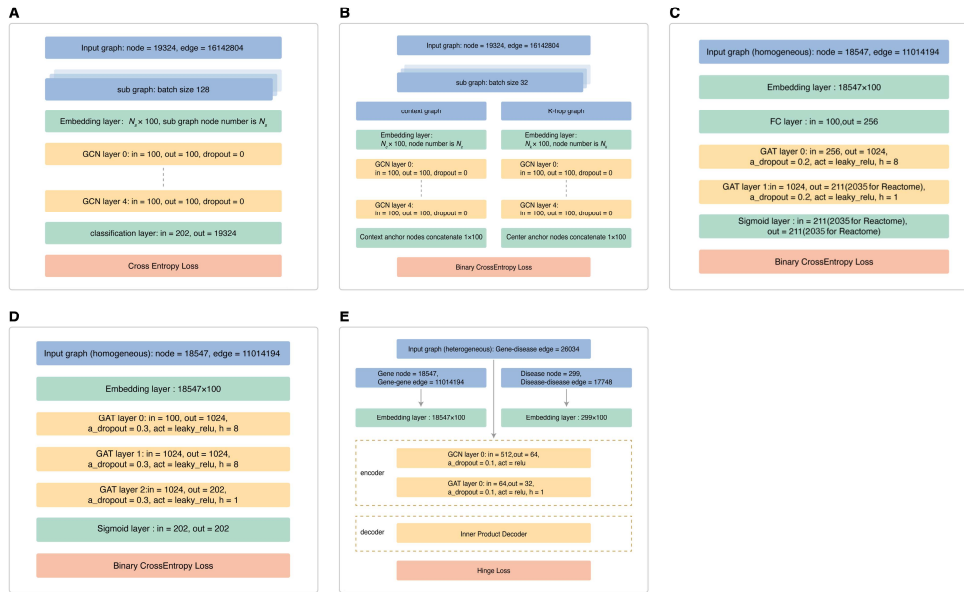

**Figure S1. Schematic diagram of Graphene model architecture. (A) Pre-training for masked node recovery (B) Pre-training for context prediction (C) Re-training for gene set member identification task (D) Re-training for disease gene reprioritization task (E) Bipartite architecture for comorbidity prediction task.**

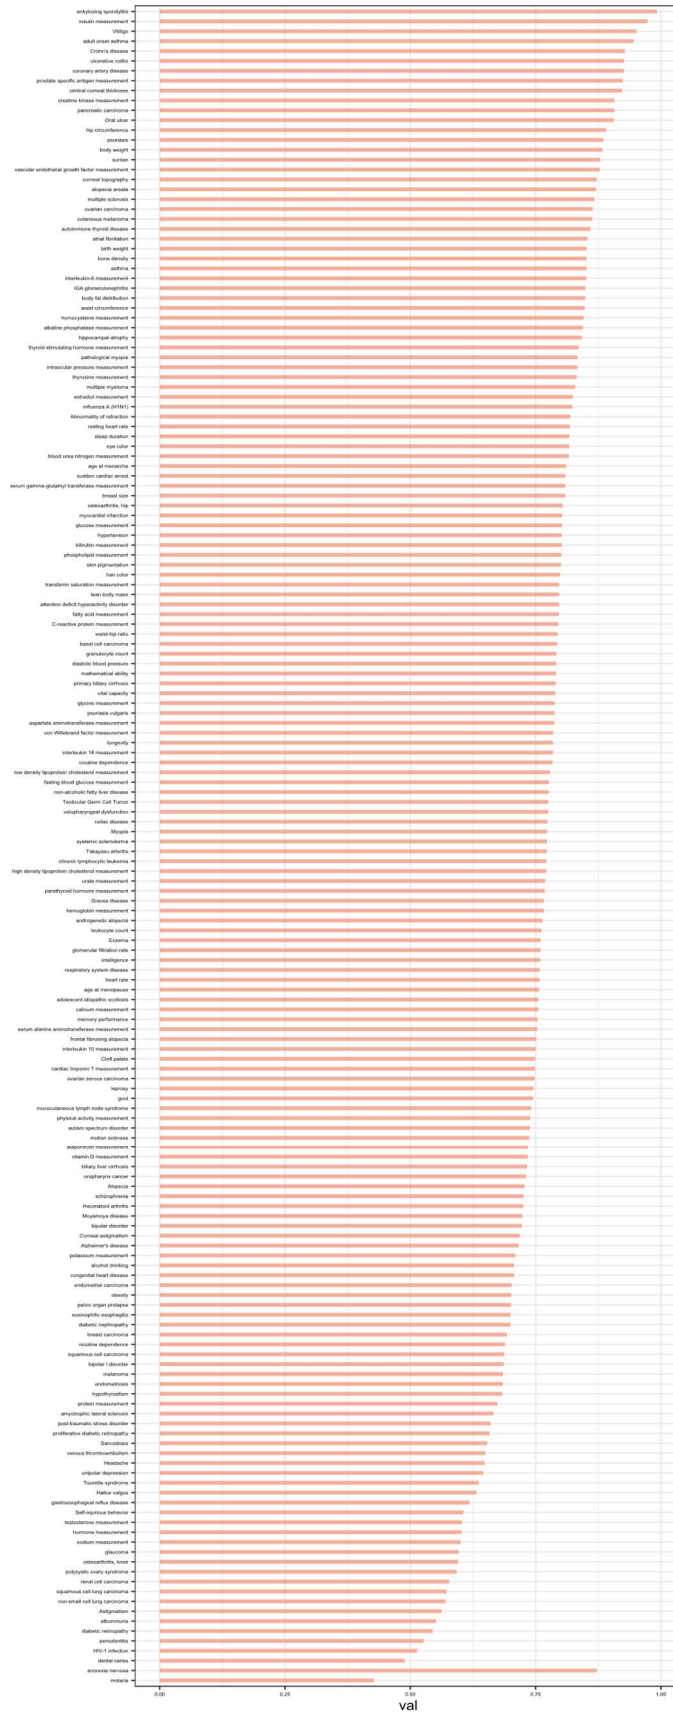

**Figure S2. AUROC results for all 171 DisGeNET diseases. Diseases are represented by UMLS CUI ids.**



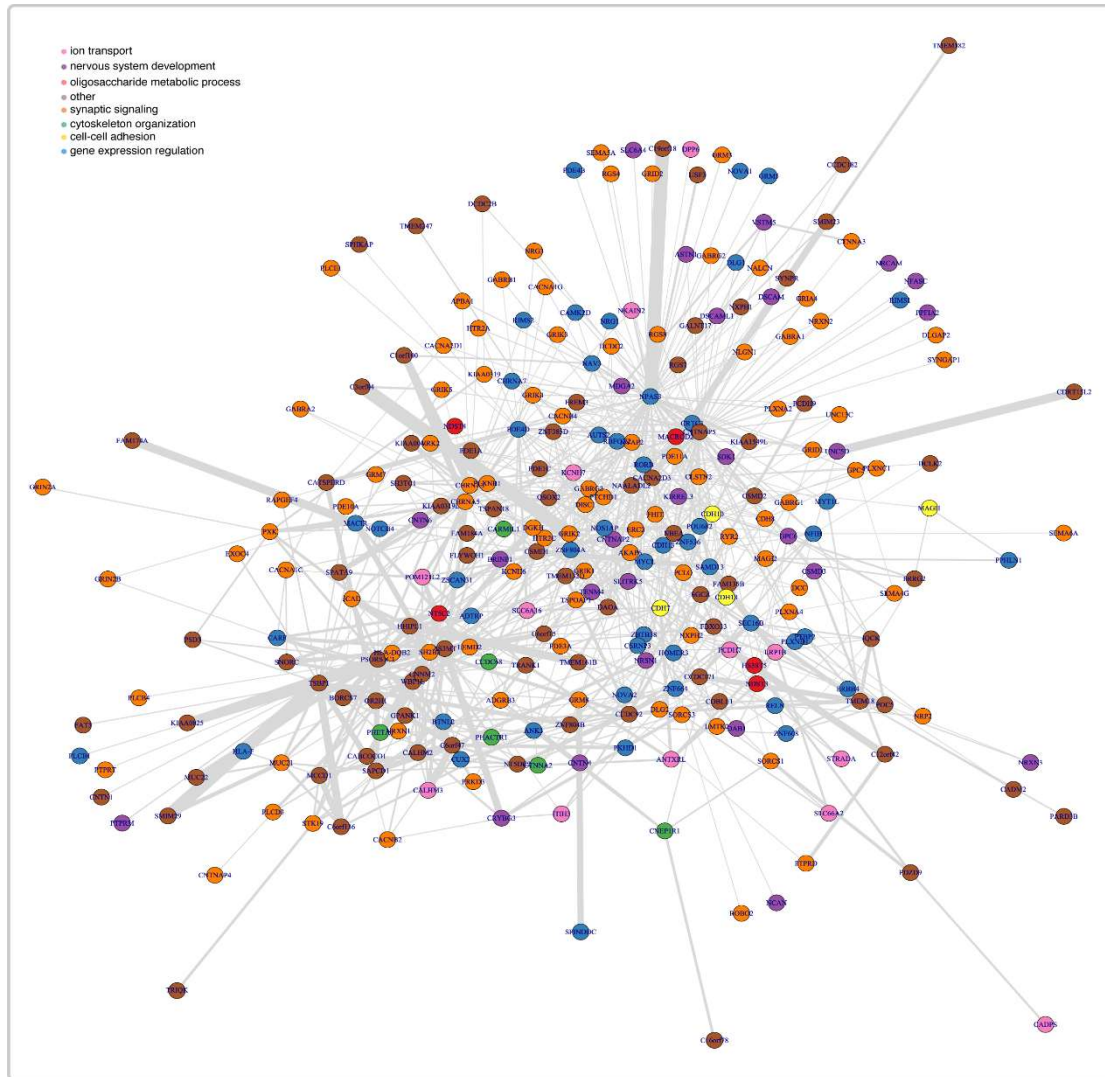

**Figure S4. Attention weights showcase interaction patterns of 300 Graphene TPGs for SCZ.**

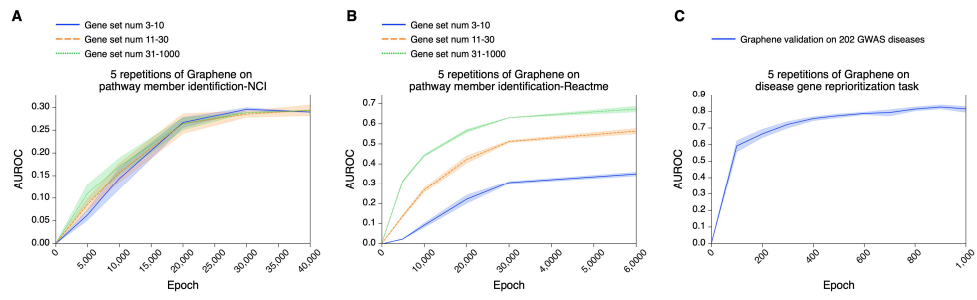

**Figure S5. Evaluation with 5 repetitions of Graphene on pathway member identification task and disease gene re-prioritization task.**

## Supplementary Tables

**Table S1. Datasets used in this study**

| <b>Dataset</b>      | <b>Download link</b>                                                                                        |
|---------------------|-------------------------------------------------------------------------------------------------------------|
| <b>Humanbase</b>    | <a href="https://hb.flatironinstitute.org/download">https://hb.flatironinstitute.org/download</a>           |
| <b>HuRI</b>         | <a href="http://www.interactome-atlas.org/download">http://www.interactome-atlas.org/download</a>           |
| <b>STRING9606</b>   | <a href="https://string-db.org">https://string-db.org</a>                                                   |
| <b>PCNet</b>        | <a href="http://www.ndexbio.org">http://www.ndexbio.org</a>                                                 |
| <b>NCI(PID)</b>     | <a href="http://www.ndexbio.org">http://www.ndexbio.org</a>                                                 |
| <b>Reactome</b>     | <a href="https://reactome.org/download-data">https://reactome.org/download-data</a>                         |
| <b>GWAS Catalog</b> | <a href="https://www.ebi.ac.uk/gwas/docs/file-downloads">https://www.ebi.ac.uk/gwas/docs/file-downloads</a> |
| <b>DisGeNET</b>     | <a href="https://www.disgenet.org/downloads">https://www.disgenet.org/downloads</a>                         |
| <b>UK BioBank</b>   | <a href="https://pan.ukbb.broadinstitute.org/downloads">https://pan.ukbb.broadinstitute.org/downloads</a>   |

**Table S2. Runtime required to obtain the results of Figure 2C, 2D in downstream re-training of Graphene and competing methods, evaluated on DisGeNET cross-dataset test (171 diseases) and UK Biobank cross-dataset test (81 diseases) by a single Quadro RTX 6000 GPU.**

|                                      | GenePanda     | Graphene    | GWAS<br>P-value | N2V     | NAGA          | Set2Gaussian  |
|--------------------------------------|---------------|-------------|-----------------|---------|---------------|---------------|
| <b>UK Biobank cross-dataset test</b> | 2,840 seconds | 295 seconds | 243 seconds     | >2 days | 2,358 seconds | 1,615 seconds |
| <b>DisGeNET cross-dataset test</b>   | 5,960 seconds | 306 seconds | 513 seconds     | >4 days | 4,980 seconds | 1,620 seconds |



**Table S3. Methods comparison for pathway gene set recovery**

| <b>Dataset</b>  | <b>Method</b>                          | <b>AUPRC</b> |              |                |
|-----------------|----------------------------------------|--------------|--------------|----------------|
|                 |                                        | <b>3-10</b>  | <b>11-30</b> | <b>31-1000</b> |
| <b>NCI</b>      | Mean                                   | 0.30         | 0.22         | 0.19           |
|                 | Set2Gaussian                           | 0.31         | 0.27         | 0.26           |
|                 | Graphene (random input embedding)      | 0.24         | 0.27         | 0.29           |
|                 | Graphene (pre-trained input embedding) | 0.29         | 0.31         | 0.29           |
| <b>Reactome</b> | Mean                                   | 0.40         | 0.47         | 0.49           |
|                 | Set2Gaussian                           | 0.43         | 0.56         | 0.63           |
|                 | Graphene (random input embedding)      | 0.29         | 0.52         | 0.67           |
|                 | Graphene (pre-trained input embedding) | 0.42         | 0.58         | 0.69           |

**Table S4. Normalized Jaccard Index of GWAS hits for eight diseases**

| <b>Disease1</b>                          | <b>Disease2</b>                          | <b>value</b> |
|------------------------------------------|------------------------------------------|--------------|
| unipolar depression                      | post-traumatic stress disorder           | 0.0792       |
| unipolar depression                      | attention deficit hyperactivity disorder | 0.368        |
| unipolar depression                      | bipolar disorder                         | 0.324        |
| unipolar depression                      | schizophrenia                            | 0.863        |
| unipolar depression                      | autism spectrum disorder                 | 0.154        |
| unipolar depression                      | Tourette syndrome                        | 0.102        |
| unipolar depression                      | anorexia nervosa                         | 0.121        |
| post-traumatic stress disorder           | attention deficit hyperactivity disorder | 0.122        |
| post-traumatic stress disorder           | bipolar disorder                         | 0.0298       |
| post-traumatic stress disorder           | schizophrenia                            | 0.0847       |
| post-traumatic stress disorder           | autism spectrum disorder                 | 0            |
| post-traumatic stress disorder           | Tourette syndrome                        | 0            |
| post-traumatic stress disorder           | anorexia nervosa                         | 0.133        |
| attention deficit hyperactivity disorder | bipolar disorder                         | 0.141        |
| attention deficit hyperactivity disorder | schizophrenia                            | 0.267        |
| attention deficit hyperactivity disorder | autism spectrum disorder                 | 0.388        |
| attention deficit hyperactivity disorder | Tourette syndrome                        | 0.0428       |
| attention deficit hyperactivity disorder | anorexia nervosa                         | 0.126        |
| bipolar disorder                         | schizophrenia                            | 1            |
| bipolar disorder                         | autism spectrum disorder                 | 0.114        |
| bipolar disorder                         | Tourette syndrome                        | 0.0934       |
| bipolar disorder                         | anorexia nervosa                         | 0.185        |
| schizophrenia                            | autism spectrum disorder                 | 0.179        |
| schizophrenia                            | Tourette syndrome                        | 0.0490       |
| schizophrenia                            | anorexia nervosa                         | 0.0486       |
| autism spectrum disorder                 | Tourette syndrome                        | 0            |
| autism spectrum disorder                 | anorexia nervosa                         | 0.106        |
| Tourette syndrome                        | anorexia nervosa                         | 0.495        |

**Table S5. Normalized Jaccard Index of DisGeNET genes for eight diseases**

| <b>Disease1</b>                          | <b>Disease2</b>                          | <b>value</b> |
|------------------------------------------|------------------------------------------|--------------|
| unipolar depression                      | post-traumatic stress disorder           | 0.464        |
| unipolar depression                      | attention deficit hyperactivity disorder | 0.115        |
| unipolar depression                      | bipolar disorder                         | 0.775        |
| unipolar depression                      | schizophrenia                            | 0.560        |
| unipolar depression                      | autism spectrum disorder                 | 0.0562       |
| unipolar depression                      | Tourette syndrome                        | 0.341        |
| unipolar depression                      | anorexia nervosa                         | 0.343        |
| post-traumatic stress disorder           | attention deficit hyperactivity disorder | 0.0562       |
| post-traumatic stress disorder           | bipolar disorder                         | 0.507        |
| post-traumatic stress disorder           | schizophrenia                            | 0.446        |
| post-traumatic stress disorder           | autism spectrum disorder                 | 0.0137       |
| post-traumatic stress disorder           | Tourette syndrome                        | 0.297        |
| post-traumatic stress disorder           | anorexia nervosa                         | 0.487        |
| attention deficit hyperactivity disorder | bipolar disorder                         | 0.0542       |
| attention deficit hyperactivity disorder | schizophrenia                            | 0.0258       |
| attention deficit hyperactivity disorder | autism spectrum disorder                 | 0            |
| attention deficit hyperactivity disorder | Tourette syndrome                        | 0.157        |
| attention deficit hyperactivity disorder | anorexia nervosa                         | 0.111        |
| bipolar disorder                         | schizophrenia                            | 1            |
| bipolar disorder                         | autism spectrum disorder                 | 0.0613       |
| bipolar disorder                         | Tourette syndrome                        | 0.307        |
| bipolar disorder                         | anorexia nervosa                         | 0.293        |
| schizophrenia                            | autism spectrum disorder                 | 0.116        |
| schizophrenia                            | Tourette syndrome                        | 0.258        |
| schizophrenia                            | anorexia nervosa                         | 0.200        |
| autism spectrum disorder                 | Tourette syndrome                        | 0.108        |
| autism spectrum disorder                 | anorexia nervosa                         | 0.0413       |
| Tourette syndrome                        | anorexia nervosa                         | 0.329        |

**Table S6. Normalized Jaccard Index of Graphene TPGs for eight diseases**

| <b>Disease1</b>                          | <b>Disease2</b>                          | <b>value</b> |
|------------------------------------------|------------------------------------------|--------------|
| unipolar depression                      | post-traumatic stress disorder           | 0.455        |
| unipolar depression                      | attention deficit hyperactivity disorder | 0.479        |
| unipolar depression                      | bipolar disorder                         | 0.938        |
| unipolar depression                      | schizophrenia                            | 1            |
| unipolar depression                      | autism spectrum disorder                 | 0.536        |
| unipolar depression                      | Tourette syndrome                        | 0.0203       |
| unipolar depression                      | anorexia nervosa                         | 0.346        |
| post-traumatic stress disorder           | attention deficit hyperactivity disorder | 0.407        |
| post-traumatic stress disorder           | bipolar disorder                         | 0.596        |
| post-traumatic stress disorder           | schizophrenia                            | 0.452        |
| post-traumatic stress disorder           | autism spectrum disorder                 | 0.937        |
| post-traumatic stress disorder           | Tourette syndrome                        | 0.363        |
| post-traumatic stress disorder           | anorexia nervosa                         | 0.315        |
| attention deficit hyperactivity disorder | bipolar disorder                         | 0.455        |
| attention deficit hyperactivity disorder | schizophrenia                            | 0.458        |
| attention deficit hyperactivity disorder | autism spectrum disorder                 | 0.406        |
| attention deficit hyperactivity disorder | Tourette syndrome                        | 0.0662       |
| attention deficit hyperactivity disorder | anorexia nervosa                         | 0.504        |
| bipolar disorder                         | schizophrenia                            | 0.955        |
| bipolar disorder                         | autism spectrum disorder                 | 0.405        |
| bipolar disorder                         | Tourette syndrome                        | 0            |
| bipolar disorder                         | anorexia nervosa                         | 0.372        |
| schizophrenia                            | autism spectrum disorder                 | 0.343        |
| schizophrenia                            | Tourette syndrome                        | 0.0271       |
| schizophrenia                            | anorexia nervosa                         | 0.309        |
| autism spectrum disorder                 | Tourette syndrome                        | 0.404        |
| autism spectrum disorder                 | anorexia nervosa                         | 0.439        |
| Tourette syndrome                        | anorexia nervosa                         | 0.0324       |

**Table S7. Normalized Jaccard Index of NAGA rankings for eight diseases**

| <b>Disease1</b>                          | <b>Disease2</b>                          | <b>value</b> |
|------------------------------------------|------------------------------------------|--------------|
| unipolar depression                      | post-traumatic stress disorder           | 0.09         |
| unipolar depression                      | attention deficit hyperactivity disorder | 0.10         |
| unipolar depression                      | bipolar disorder                         | 0.36         |
| unipolar depression                      | schizophrenia                            | 1.00         |
| unipolar depression                      | autism spectrum disorder                 | 0.26         |
| unipolar depression                      | Tourette syndrome                        | 0.00         |
| unipolar depression                      | anorexia nervosa                         | 0.15         |
| post-traumatic stress disorder           | attention deficit hyperactivity disorder | 0.01         |
| post-traumatic stress disorder           | bipolar disorder                         | 0.05         |
| post-traumatic stress disorder           | schizophrenia                            | 0.05         |
| post-traumatic stress disorder           | autism spectrum disorder                 | 0.09         |
| post-traumatic stress disorder           | Tourette syndrome                        | 0.07         |
| post-traumatic stress disorder           | anorexia nervosa                         | 0.07         |
| attention deficit hyperactivity disorder | bipolar disorder                         | 0.06         |
| attention deficit hyperactivity disorder | schizophrenia                            | 0.06         |
| attention deficit hyperactivity disorder | autism spectrum disorder                 | 0.14         |
| attention deficit hyperactivity disorder | Tourette syndrome                        | 0.04         |
| attention deficit hyperactivity disorder | anorexia nervosa                         | 0.01         |
| bipolar disorder                         | schizophrenia                            | 0.95         |
| bipolar disorder                         | autism spectrum disorder                 | 0.03         |
| bipolar disorder                         | Tourette syndrome                        | 0.03         |
| bipolar disorder                         | anorexia nervosa                         | 0.05         |
| schizophrenia                            | autism spectrum disorder                 | 0.11         |
| schizophrenia                            | Tourette syndrome                        | 0.04         |
| schizophrenia                            | anorexia nervosa                         | 0.05         |
| autism spectrum disorder                 | Tourette syndrome                        | 0.03         |
| autism spectrum disorder                 | anorexia nervosa                         | 0.52         |
| Tourette syndrome                        | anorexia nervosa                         | 0.17         |

**Table S8. cross-trait LD score for eight diseases**

| <b>Disease1</b>                          | <b>Disease2</b>                          | <b>value</b> |
|------------------------------------------|------------------------------------------|--------------|
| unipolar depression                      | attention deficit hyperactivity disorder | 0.629        |
| unipolar depression                      | anorexia nervosa                         | 0.400        |
| unipolar depression                      | autism spectrum disorder                 | 0.486        |
| unipolar depression                      | Tourette syndrome                        | 0.329        |
| post-traumatic stress disorder           | unipolar depression                      | 0            |
| post-traumatic stress disorder           | attention deficit hyperactivity disorder | 0            |
| post-traumatic stress disorder           | bipolar disorder                         | 0            |
| post-traumatic stress disorder           | schizophrenia                            | 0            |
| post-traumatic stress disorder           | autism spectrum disorder                 | 0            |
| post-traumatic stress disorder           | Tourette syndrome                        | 0            |
| post-traumatic stress disorder           | anorexia nervosa                         | 0            |
| attention deficit hyperactivity disorder | anorexia nervosa                         | 0.0143       |
| attention deficit hyperactivity disorder | autism spectrum disorder                 | 0.529        |
| attention deficit hyperactivity disorder | Tourette syndrome                        | 0.271        |
| bipolar disorder                         | unipolar depression                      | 0.471        |
| bipolar disorder                         | attention deficit hyperactivity disorder | 0.257        |
| bipolar disorder                         | anorexia nervosa                         | 0.143        |
| bipolar disorder                         | autism spectrum disorder                 | 0.243        |
| bipolar disorder                         | Tourette syndrome                        | 0.114        |
| schizophrenia                            | bipolar disorder                         | 1            |
| schizophrenia                            | unipolar depression                      | 0.443        |
| schizophrenia                            | attention deficit hyperactivity disorder | 0.229        |
| schizophrenia                            | anorexia nervosa                         | 0.371        |
| schizophrenia                            | autism spectrum disorder                 | 0.357        |
| schizophrenia                            | Tourette syndrome                        | 0.157        |
| autism spectrum disorder                 | Tourette syndrome                        | 0.229        |
| Tourette syndrome                        | anorexia nervosa                         | 0.114        |
| anorexia nervosa                         | autism spectrum disorder                 | 0.157        |

**Table S9. Spearman correlation of the four methods (Graphene, DisGeNet, NAGA, GWAS) against ct-LDSC.**

| <b>Methods</b>              | <b>Graphene</b> | <b>DisGeNet</b> | <b>NAGA</b> | <b>GWAS</b> |
|-----------------------------|-----------------|-----------------|-------------|-------------|
| <b>Spearman correlation</b> | 0.767           | 0.596           | 0.770       | 0.731       |

**Table S10. Overlapping TPGs identified by Graphene for 4 disease pairs.**

| <b>Disease Pair</b> | <b>Overlapping genes</b>                                                                                                                                                                                                                                                                                                                                                                                                                                                                                                                                                                                                                                                                                                                                                                                                                                                                                                                                                                                                                                                                                                                                                                                                      |
|---------------------|-------------------------------------------------------------------------------------------------------------------------------------------------------------------------------------------------------------------------------------------------------------------------------------------------------------------------------------------------------------------------------------------------------------------------------------------------------------------------------------------------------------------------------------------------------------------------------------------------------------------------------------------------------------------------------------------------------------------------------------------------------------------------------------------------------------------------------------------------------------------------------------------------------------------------------------------------------------------------------------------------------------------------------------------------------------------------------------------------------------------------------------------------------------------------------------------------------------------------------|
| BIP vs MDD          | PDE1A,GRID1,GRIA4,GRID2,KCNC2,PLCH1,MDGA2,GABRB2,FAM104A,CARMIL1,GRM3,RAPGEF4,NRXN1,GRM5,DGKH,NCAN,ANTXR1,CTNNA2,TMPRSS7,GABRG3,GABRB3,CNTNAP2,CNTN6,SCN8A,RIMS1,PDE1C,GRM1,NYAP2,MAGI2,BTNL2,ZNF804A,PDE11A,FHIT,CBLN4,RBFOX1,DAOA,DISC1,GRIK2,GRIK4,CACNA1E,GRM8,GRIA1,KCNA4,SGCZ,NXPH1,NBEA,SAMD13,NBPF3,CSRNP3,TMEM247,KCNB2,MTUS2,MACROD2,CNTNAP5,CLSTN2,TMEM108,CSMD1,DAB1,KCNQ3,CPNE4,FAM135B,DLG2,RAPGEF5,GABRG2,GRM7,CDH8,RGS7,STPG3,AKAP6,KCND2,CACNB4,ERC2,GABRA2,CADM2,CACNA1C,CACNA2D3,CSMD3,TMEM161B,KCNV1,KCNH7,RIMS2,LRP1B,GRIK1,RESF1,AUTS2,SDK1,CACNA2D1,NKAIN2,PTPRT,CNTNAP4,OPCML,PCLO,CNTN1,NAV3,TRANK1,SPINDOC,PTPRM,THSD7B,SMIM22,CFAP54,NRG3,KCNH6,NALCN,PTPRD,NXPH2,SCN1A,SCN2A,KCND3,KCNC1,ZNF664,PCDH7,GABRB1,NPAS3,CDH13,CSMD2,VSTM5,GRIN2A,NAALADL2,KCNB1,RGS8,NRXN3,NELL1                                                                                                                                                                                                                                                                                                                                                                                                                       |
| SCZ vs MDD          | PDE1A,CADPS,GRID1,GRIA2,MUC21,GRIA4,GRID2,FREM3,PLCH1,SMIM29,HLA-G,NOVA2,MDGA2,GABRB2,SNAP91,CARMIL1,GRM3,NRXN1,MAGI1,RAPGEF4,GRM5,DGKH,NCAN,ANTXR1,CTNNA2,SORCS3,FAM174A,FAT3,GABRB3,GABRG3,CNTNAP2,PTPRK,SCN8A,NETO1,CNTN6,TSPAN18,CTNND2,POU6F2,RIMS1,PDE1C,GPC6,GRM1,NYAP2,MAGI2,UNC13C,BTNL2,CDH9,ROBO2,ZNF804A,ASIC2,ZNF536,RAB3C,PDE11A,FHIT,RBFOX1,GRIN2B,DAOA,DISC1,GRIK2,GRIK4,GRIA1,CACNA1E,GRM8,CNTN4,ANKS1B,SGCZ,PPFIA2,CTNNA3,NXPH1,NBEA,SAMD13,UNC5D,TMEM247,MTUS2,CSRNP3,MACROD2,NRG1,CNTNAP5,JCAD,RELN,CLSTN2,SAPCD1,TRIM26,SYNPR,TMEM108,LMTK2,PCDH9,CSMD1,DAB1,C6orf47,CPNE4,FAM135B,DLG2,RAPGEF5,GABRG2,GRM7,CDH8,ASTN1,ZNF385D,STUM,PLXNC1,RGS7,DSCAML1,SEMA6D,DLG1,STPG3,RBFOX2,AKAP6,NPIP5,NDST4,CACNB4,ERC2,GABRA2,CADM2,SNORC,TMEM161B,CSMD3,CACNA1C,PCDH17,CACNA2D3,ROBO1,KCNH7,NOVA1,RIMS2,LRP1B,GRIK1,CNTN5,RESF1,SDK1,C3orf84,AUTS2,CACNA2D1,CNEPIR1,NKAIN2,PTPRT,OPCML,CNTNAP4,PCLO,DSCAM,CNTN1,GPC5,NAV3,PRRG2,TRANK1,CDRT15L2,DPP6,NRCAM,SPINDOC,PTPRM,NRXN2,SMIM22,SEMA5A,GALNT17,KCNQ5,NRG3,CBLN2,KCNH6,NALCN,PTPRD,NXPH2,CDH7,SCN1A,SCN2A,DCC,QSOX2,CDH18,HOMER3,ZNF664,PCDH7,GABRB1,NLGN1,NFASC,NRXN3,NPAS3,CDH13,CSMD2,GRIK3,VSTM5,GRIN2A,NAALADL2,RGS8,CDH10,C6orf136,UNC5C,NELL1,NCAM2 |
| MDD vs ADHD         | FHIT,CADPS,RBFOX1,DAOA,GRM7,SPINDOC,CDH8,PTPRM,ZNF385D,GRID2,THSD7B,SMIM22,CFAP54,SEMA5A,NRG3,SGCZ,SEMA6D,PCDHGA1,AKAP6,NRXN1,NXPH1,CTNNA3,NPIP5,SAMD13,ERC2,UNC5D,NALCN,PTPRD,CADM2,CTNNA2,MACROD2,CNTNAP5,RELN,DCC,CLSTN2,CACNA2D3,GABRG3,CNTNAP2,PCDH7,NLGN1,ROBO1,CTNND2,NPAS3,GPC6,LRP1B,CDH13,PCDH9,CSMD1,GRIK1,CSMD2,NYAP2,SDK1,C3orf84,CPNE4,ROBO2,CDH9,CACNA2D1,NAALADL2,FAM135B,NRXN3,UNC5C,GPC5,NELL1,CDH10,NAV3                                                                                                                                                                                                                                                                                                                                                                                                                                                                                                                                                                                                                                                                                                                                                                                                   |
| PTSD vs ASD         | CBLN4,CSMD1,NCAN,FAM135B,CNTNAP2,SGCZ,SAMD13,TSBP1,NRXN2,LRP1B,SMIM22,GPC5,CNTNAP5,NRXN3,GRID1,MACROD2,GALNT17,HS3ST3A1,EXTL2,GPC6,HS3ST1,DAOA,HS2ST1,HS3ST3B1,NRXN1,HS3ST5,NDST4,RBFOX1,NDST2,CADPS,NKAIN2,PCDH9,GLCE,NDST3,NLGN1,HS3ST2,CNTNAP4,BRINP1,ARSK,GRID2,ERC2,FAM20B,UST,CADM2,GPC2,CACNA2D3,MACIR                                                                                                                                                                                                                                                                                                                                                                                                                                                                                                                                                                                                                                                                                                                                                                                                                                                                                                                 |



**Table S11. Non-overlapping CC-GWAS genes identified by Graphene for 9 disease pairs.**

| <b>Disease Pair</b> | <b>Graphene prediction of CC-GWAS Gene(symbol)</b>                                                                                                          |
|---------------------|-------------------------------------------------------------------------------------------------------------------------------------------------------------|
| ANO vs TS           | POU3F2                                                                                                                                                      |
| BIP vs ADHD         | TRANK1, SCN2A                                                                                                                                               |
| SCZ vs ADHD         | TRANK1                                                                                                                                                      |
| SCZ vs MDD          | ZNF536, GRM3, PTBP2, DGKI, TRANK1, AS3MT, SATB2, ZNF804A, SDCCAG8                                                                                           |
| SCZ vs ANO          | SPHKAP, IMMP2L, SEMA6D(not in training set), GRIA1, DLG2, CHRNA3, CNNM2                                                                                     |
| SCZ vs ASD          | CCDC68, NEGR1, TRANK1, AS3MT, SATB2, DRD2                                                                                                                   |
| SCZ vs BIP          | MAF (not in training set)                                                                                                                                   |
| SCZ vs MDD          | KCNV1(not in training set), IMMP2L, HS3ST5(not in training set), DGKI, CACNB2, PRKD1, CNNM2, SATB2, SNX19, PSD3, PCDHA7(not in training set), CHRNA3, ERBB4 |
| SCZ vs TS           | NFIB (not in training set), ZNF536, POU3F2(not in training set)                                                                                             |
